# Supplementary material for: Photophysical properties of azaboradibenzo[6]helicene derivatives
Source: Royal Society of Chemistry journal article supplement (doi:10.1039/c3tc00040k), 2013-01-01
Supplement: c3tc00040k.pdf [file c3tc00040k.pdf]

# Photophysical properties of azaboradibenzo[6]helicene derivatives

*Yanling Si<sup>a</sup> and Guochun Yang<sup>\*b</sup>*

a. College of Resource and Environmental Science, Jilin Agricultural University, Changchun, 130118 Jilin, China

b. Institute of Functional Material Chemistry, Faculty of Chemistry, Northeast Normal University, Changchun, 130024 Jilin, China.

E-mail: yanggc468@nenu.edu.cn

## Contents

|                                                                                                                                                                                                      |            |
|------------------------------------------------------------------------------------------------------------------------------------------------------------------------------------------------------|------------|
| 1. The main concerned bond length for compound <b>1</b> between experiment and calculation                                                                                                           | <b>S2</b>  |
| 2. Computed absorption wavelengths (nm) using the B3LYP functional at the different basis sets level for compound <b>1</b>                                                                           | <b>S2</b>  |
| 3. Calculated UV-Vis (left) and CD (right) spectra of compound <b>1</b> using five different functional                                                                                              | <b>S3</b>  |
| 4. Computed HOMO and LUMO energy level and corresponding energy gaps ( $E_g$ =LUMO-HOMO) in eV using different functionals at 6-31+G(d) basis set level for compound <b>1</b>                        | <b>S4</b>  |
| 5. The calculated excitation energies, oscillator strengths and rotational strengths for compound <b>1</b> in the gas phase at the B3LYP/ 6-31+G(d) level.                                           | <b>S4</b>  |
| 6. Molecular orbitals involved into the main CD transition of compounds <b>1</b>                                                                                                                     | <b>S9</b>  |
| 7. Selected bond lengths (Å) for compound <b>1</b> : ground states ( $S_0$ ) and first excited states ( $S_1$ )                                                                                      | <b>S9</b>  |
| 8. Calculated bond-length changes (in Å) upon oxidation (CBLA, going from the neutral to the cation state) and reduction (ABLA, going from the neutral to the anion state) of the studied compounds. | <b>S10</b> |
| 9. Computed absorption wavelengths ( $\lambda$ in nm), oscillator strengths ( $f$ ), and major contribution for the studied compounds <b>2-5</b>                                                     | <b>S10</b> |
| 10. Computed HOMO and LUMO energy level and corresponding energy gaps ( $E_g$ =LUMO-HOMO) for compounds <b>2-5</b>                                                                                   | <b>S11</b> |
| 11. Molecular orbital isosurfaces involved in the main electron transitions of compounds <b>2-5</b> at the TDB3LYP/6-31+G(d) level of theory                                                         | <b>S12</b> |
| 12. Dependence of the second-order NLO values and energy gaps                                                                                                                                        | <b>S15</b> |
| 13. Cartesian Coordinates of compound <b>1</b> at B3LYP/6-31G(d,p) level                                                                                                                             | <b>S15</b> |

**Table S1.** The main concerned bond length for compound **1** between experiment and calculation

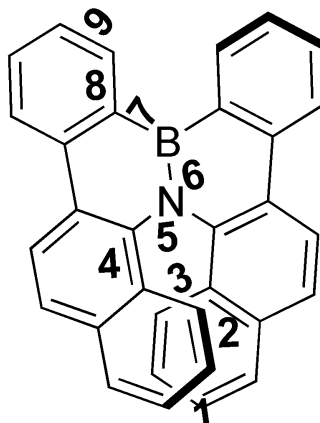

| Bond | B3LYP | B3LYP-D | B2PLYP-D | Experiment | Difference |         |          |
|------|-------|---------|----------|------------|------------|---------|----------|
|      |       |         |          |            | B3LYP      | B3LYP-D | B2PLYP-D |
| 1    | 1.412 | 1.414   | 1.412    | 1.401      | 0.011      | 0.013   | 0.011    |
| 2    | 1.378 | 1.378   | 1.378    | 1.369      | 0.009      | 0.009   | 0.009    |
| 3    | 1.422 | 1.422   | 1.421    | 1.408      | 0.014      | 0.014   | 0.013    |
| 4    | 1.445 | 1.443   | 1.442    | 1.444      | 0.001      | -0.001  | -0.002   |
| 5    | 1.421 | 1.418   | 1.416    | 1.422      | -0.001     | -0.004  | -0.006   |
| 6    | 1.451 | 1.448   | 1.447    | 1.431      | 0.020      | 0.017   | 0.016    |
| 7    | 1.546 | 1.544   | 1.543    | 1.548      | -0.002     | -0.004  | -0.005   |
| 8    | 1.409 | 1.409   | 1.409    | 1.412      | -0.003     | -0.003  | -0.003   |
| 9    | 1.390 | 1.391   | 1.390    | 1.386      | 0.004      | 0.005   | 0.004    |

**Note:** the difference is equal to calculation value minus experimental value

**Table S2.** Computed absorption wavelengths (nm) using the B3LYP functional at the different basis sets level for compound **1**

| Basis set       | Band 1 | Band 2 | Band 3 |
|-----------------|--------|--------|--------|
| 6-31G(d)        | 265.58 | 307.42 | 372.50 |
| 6-31+G(d)       | 265.50 | 313.06 | 376.86 |
| 6-31++G(d,p)    | 265.86 | 313.77 | 377.02 |
| 6-311++G(d,p)   | 266.74 | 315.37 | 378.82 |
| 6-311++G(2d,2p) | 273.14 | 316.64 | 380.45 |
| exp             | 252    | 310    | 373    |

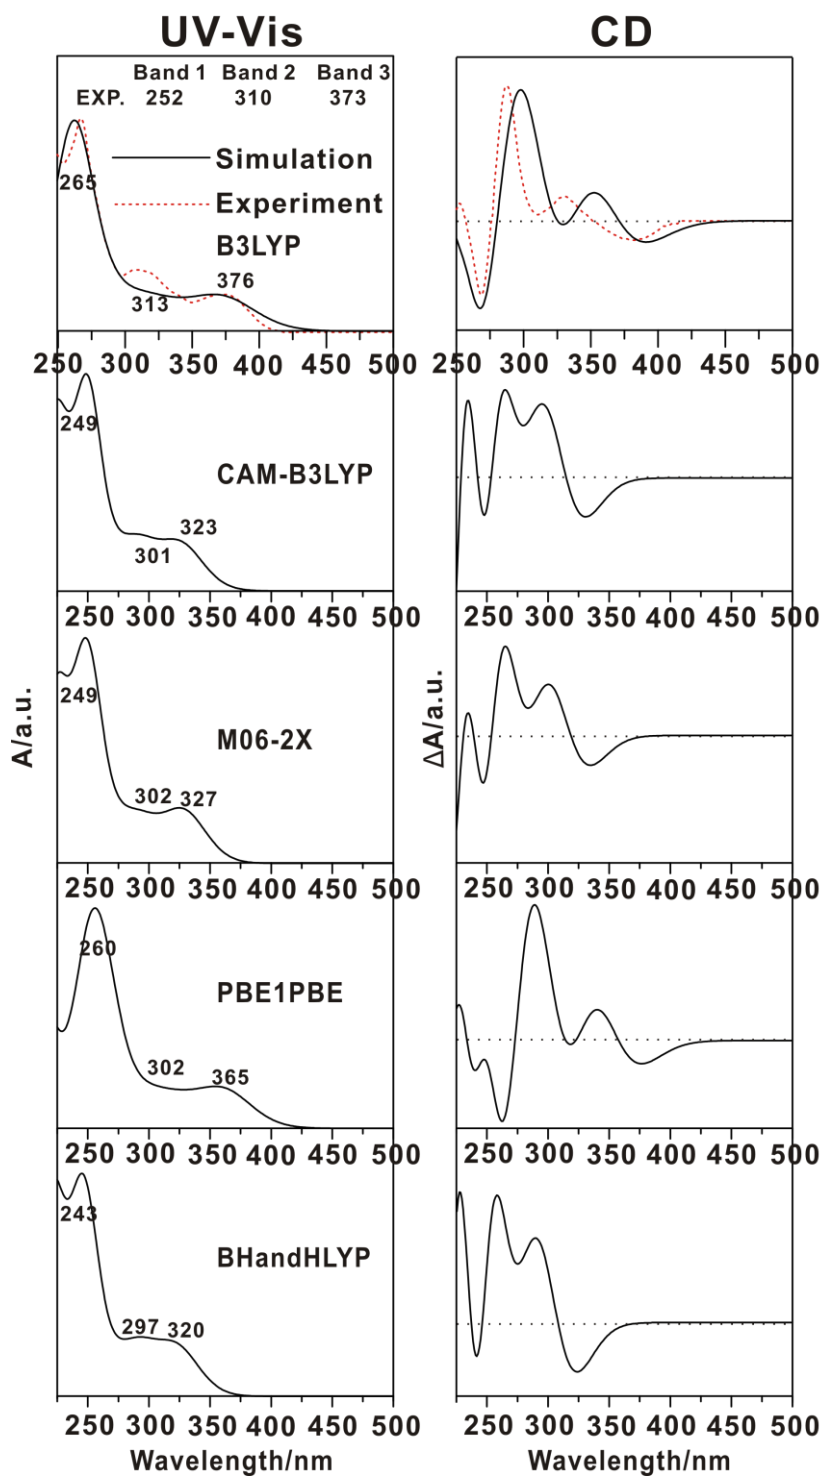

**Figure S1.** Calculated UV-Vis (left) and CD (right) spectra of compound **1** using five different DFT functionals.

**Table S3.** Computed HOMO and LUMO energy levels and corresponding energy gaps ( $E_g$ =LUMO-HOMO) in eV using different functionals at 6-31+G(d) basis set level for compound **1**

| Functional | HOMO  | LUMO  | $E_g$ |
|------------|-------|-------|-------|
| B3LYP      | -5.49 | -1.66 | 3.83  |
| PBE        | -5.69 | -1.55 | 4.14  |
| M06-2X     | -6.62 | -0.90 | 5.72  |
| CAM-B3LYP  | -6.69 | -0.55 | 6.13  |
| BH&HLYP    | -6.29 | -0.62 | 5.67  |

**Table S4.** The calculated excitation energies, oscillator strengths and rotational strengths for compound **1** in the gas phase at the B3LYP/ 6-31+G(d) level.

| states | eV     | $\lambda^a$ | $f^b$  | Rlength <sup>c</sup> | Rvelocity <sup>c</sup> |
|--------|--------|-------------|--------|----------------------|------------------------|
| 1      | 3.2749 | 378.59      | 0.0798 | -91.6153             | -91.7452               |
| 2      | 3.2900 | 376.86      | 0.0936 | -50.3600             | -47.8887               |
| 3      | 3.5295 | 351.28      | 0.0806 | 228.1187             | 220.5851               |
| 4      | 3.5709 | 347.21      | 0.0152 | 1.3597               | 1.2798                 |
| 5      | 3.7666 | 329.17      | 0.0846 | -166.0210            | -173.2402              |
| 6      | 3.7881 | 327.30      | 0.0085 | -0.1802              | -0.3735                |
| 7      | 3.9488 | 313.98      | 0.0015 | -3.5842              | -4.9601                |
| 8      | 3.9603 | 313.06      | 0.1140 | 17.0291              | 17.5108                |
| 9      | 4.1240 | 300.64      | 0.0500 | 258.6109             | 264.7077               |
| 10     | 4.1333 | 299.96      | 0.0034 | -8.0858              | -7.8244                |
| 11     | 4.1870 | 296.11      | 0.0004 | -1.5663              | -1.9728                |
| 12     | 4.2371 | 292.61      | 0.0725 | 203.2931             | 206.3888               |
| 13     | 4.3677 | 283.87      | 0.1427 | -88.2433             | -88.5035               |
| 14     | 4.3929 | 282.24      | 0.0343 | 74.7973              | 73.6017                |
| 15     | 4.4627 | 277.82      | 0.0113 | -20.0280             | -20.3495               |
| 16     | 4.5440 | 272.85      | 0.0389 | 146.8524             | 147.9948               |
| 17     | 4.5820 | 270.59      | 0.3381 | -287.2126            | -291.6210              |
| 18     | 4.5936 | 269.91      | 0.0035 | 17.5981              | 18.3334                |
| 19     | 4.6692 | 265.54      | 0.4272 | -199.6715            | -202.4535              |
| 20     | 4.7432 | 261.39      | 0.0965 | -86.9053             | -88.1921               |
| 21     | 4.8118 | 257.67      | 0.3390 | 271.7115             | 276.5727               |
| 22     | 4.8730 | 254.43      | 0.0015 | 5.8558               | 6.5696                 |
| 23     | 4.8967 | 253.20      | 0.1109 | 23.4081              | 27.0172                |
| 24     | 4.9081 | 252.61      | 0.0006 | -0.3464              | -0.5764                |
| 25     | 4.9341 | 251.28      | 0.0486 | 8.0513               | 8.4629                 |
| 26     | 4.9639 | 249.77      | 0.0984 | -59.4499             | -61.2829               |

---

|    |        |        |        |           |           |
|----|--------|--------|--------|-----------|-----------|
| 27 | 4.9735 | 249.29 | 0.0963 | -148.8644 | -152.4821 |
| 28 | 4.9867 | 248.63 | 0.0052 | 15.9670   | 17.4243   |
| 29 | 5.0607 | 244.99 | 0.0000 | -0.7821   | -0.3525   |
| 30 | 5.0923 | 243.48 | 0.0109 | 6.0671    | 8.7246    |
| 31 | 5.0929 | 243.44 | 0.0365 | -164.2425 | -172.1337 |
| 32 | 5.1214 | 242.09 | 0.0275 | 110.2489  | 114.0455  |
| 33 | 5.1517 | 240.67 | 0.0048 | 34.5240   | 38.8116   |
| 34 | 5.2099 | 237.98 | 0.0022 | 12.2194   | 14.8003   |
| 35 | 5.2290 | 237.11 | 0.0366 | 127.2723  | 130.9177  |
| 36 | 5.2511 | 236.11 | 0.0028 | 8.0441    | 8.2323    |
| 37 | 5.2683 | 235.34 | 0.0362 | 34.3041   | 35.9740   |
| 38 | 5.2699 | 235.27 | 0.0286 | 4.8582    | 5.0452    |
| 39 | 5.3002 | 233.92 | 0.0230 | 54.0860   | 55.6904   |
| 40 | 5.3020 | 233.85 | 0.0330 | -45.4341  | -47.0844  |
| 41 | 5.3383 | 232.26 | 0.0176 | -6.7522   | -7.1542   |
| 42 | 5.3408 | 232.14 | 0.0193 | 19.2419   | 19.0374   |
| 43 | 5.3546 | 231.54 | 0.0214 | -20.5942  | -21.3590  |
| 44 | 5.4102 | 229.17 | 0.0300 | 21.2778   | 22.5919   |
| 45 | 5.4298 | 228.34 | 0.0007 | -1.4913   | -1.4433   |
| 46 | 5.4627 | 226.97 | 0.0037 | -11.6021  | -11.2707  |
| 47 | 5.4742 | 226.49 | 0.0824 | 1.2008    | 1.2315    |
| 48 | 5.4836 | 226.10 | 0.0485 | 49.1023   | 49.5111   |
| 49 | 5.5017 | 225.36 | 0.0387 | 74.6276   | 78.2302   |
| 50 | 5.5094 | 225.04 | 0.0019 | 1.8799    | 1.7246    |
| 51 | 5.5293 | 224.23 | 0.1758 | -250.6036 | -259.9295 |
| 52 | 5.5400 | 223.80 | 0.0130 | 2.5683    | 2.5562    |
| 53 | 5.5413 | 223.74 | 0.0163 | 2.0705    | 3.3864    |
| 54 | 5.6111 | 220.96 | 0.0317 | 41.3472   | 43.0184   |
| 55 | 5.6145 | 220.83 | 0.0085 | -14.8114  | -16.3619  |
| 56 | 5.6614 | 219.00 | 0.0063 | -41.6302  | -43.2906  |
| 57 | 5.6827 | 218.18 | 0.0902 | 110.4852  | 113.5437  |
| 58 | 5.6980 | 217.59 | 0.0109 | -36.4082  | -36.6756  |
| 59 | 5.7100 | 217.14 | 0.0013 | 3.3983    | 3.9296    |
| 60 | 5.7212 | 216.71 | 0.0053 | -10.6949  | -10.2615  |
| 61 | 5.7253 | 216.56 | 0.0015 | 1.3249    | 1.2237    |
| 62 | 5.7424 | 215.91 | 0.0028 | 10.5607   | 10.0735   |
| 63 | 5.7631 | 215.13 | 0.0189 | 23.6458   | 24.2295   |
| 64 | 5.7849 | 214.32 | 0.0012 | 6.9698    | 7.0075    |
| 65 | 5.8139 | 213.26 | 0.0074 | -7.7655   | -8.9951   |
| 66 | 5.8224 | 212.94 | 0.0040 | 1.3564    | 1.3709    |
| 67 | 5.8319 | 212.60 | 0.0339 | 130.6848  | 137.7112  |
| 68 | 5.8331 | 212.55 | 0.0017 | 5.8493    | 7.0226    |
| 69 | 5.8351 | 212.48 | 0.0200 | 15.3023   | 15.3374   |
| 70 | 5.8545 | 211.78 | 0.0055 | 6.2730    | 4.7668    |

---

---

|     |        |        |        |           |           |
|-----|--------|--------|--------|-----------|-----------|
| 71  | 5.8804 | 210.84 | 0.0119 | 34.5659   | 36.1982   |
| 72  | 5.8838 | 210.72 | 0.1755 | -353.5692 | -366.3632 |
| 73  | 5.9109 | 209.76 | 0.0109 | 6.2792    | 6.2883    |
| 74  | 5.9423 | 208.65 | 0.0036 | -1.7831   | -1.8518   |
| 75  | 5.9443 | 208.58 | 0.0018 | 11.1553   | 11.3174   |
| 76  | 5.9594 | 208.05 | 0.0042 | -24.0495  | -22.2403  |
| 77  | 5.9686 | 207.73 | 0.0010 | -5.0910   | -5.0579   |
| 78  | 5.9803 | 207.32 | 0.0115 | -29.4803  | -31.7539  |
| 79  | 5.9939 | 206.85 | 0.0002 | 0.2275    | 1.2703    |
| 80  | 6.0287 | 205.66 | 0.0021 | 11.3892   | 11.9568   |
| 81  | 6.0305 | 205.59 | 0.0014 | 16.1910   | 16.8067   |
| 82  | 6.0463 | 205.06 | 0.0275 | -39.0715  | -39.1042  |
| 83  | 6.0492 | 204.96 | 0.0019 | -9.3015   | -9.3651   |
| 84  | 6.0708 | 204.23 | 0.0063 | 0.5767    | -0.2502   |
| 85  | 6.0773 | 204.01 | 0.0000 | -0.0028   | 0.1178    |
| 86  | 6.0848 | 203.76 | 0.0153 | -17.2394  | -17.5871  |
| 87  | 6.0882 | 203.65 | 0.0399 | -9.4618   | -10.5432  |
| 88  | 6.0915 | 203.54 | 0.0195 | 30.5674   | 33.2209   |
| 89  | 6.1104 | 202.91 | 0.0862 | 31.8055   | 31.7798   |
| 90  | 6.1423 | 201.85 | 0.1294 | 137.7118  | 141.4736  |
| 91  | 6.1444 | 201.78 | 0.0102 | -9.9370   | -10.1716  |
| 92  | 6.1730 | 200.85 | 0.0175 | -29.8351  | -29.5721  |
| 93  | 6.2075 | 199.73 | 0.0010 | -3.6974   | -3.3748   |
| 94  | 6.2144 | 199.51 | 0.0125 | 5.2249    | 5.5712    |
| 95  | 6.2222 | 199.26 | 0.0281 | 1.9157    | 1.7900    |
| 96  | 6.2285 | 199.06 | 0.0351 | 6.6910    | 6.8714    |
| 97  | 6.2592 | 198.08 | 0.0007 | 0.5308    | 0.4560    |
| 98  | 6.2700 | 197.74 | 0.0041 | 3.6471    | 3.4949    |
| 99  | 6.2854 | 197.26 | 0.0001 | 2.8559    | 3.6829    |
| 100 | 6.2863 | 197.23 | 0.0261 | -32.6276  | -33.4808  |
| 101 | 6.2868 | 197.21 | 0.0079 | -6.5227   | -6.5626   |
| 102 | 6.3071 | 196.58 | 0.0319 | -5.4890   | -5.2977   |
| 103 | 6.3077 | 196.56 | 0.0176 | -14.6981  | -15.4520  |
| 104 | 6.3313 | 195.83 | 0.0006 | 0.8834    | 0.7217    |
| 105 | 6.3465 | 195.36 | 0.0449 | -24.7701  | -25.2449  |
| 106 | 6.3627 | 194.86 | 0.0053 | 7.5183    | 7.6135    |
| 107 | 6.3736 | 194.53 | 0.0010 | 4.4952    | 4.0342    |
| 108 | 6.3923 | 193.96 | 0.0019 | 12.8309   | 14.6010   |
| 109 | 6.3925 | 193.95 | 0.0224 | -8.2271   | -8.4225   |
| 110 | 6.4068 | 193.52 | 0.0065 | 2.7858    | 3.6206    |
| 111 | 6.4210 | 193.09 | 0.0003 | 3.0413    | 3.4294    |
| 112 | 6.4259 | 192.95 | 0.0021 | 6.1682    | 7.0102    |
| 113 | 6.4340 | 192.70 | 0.0117 | -17.9409  | -18.4468  |
| 114 | 6.4446 | 192.39 | 0.0183 | 4.6233    | 3.3017    |

---

---

|     |        |        |        |          |          |
|-----|--------|--------|--------|----------|----------|
| 115 | 6.4548 | 192.08 | 0.0025 | -23.6250 | -23.8954 |
| 116 | 6.4636 | 191.82 | 0.0523 | -28.5492 | -30.6329 |
| 117 | 6.4802 | 191.33 | 0.0000 | -0.3768  | 0.3005   |
| 118 | 6.4858 | 191.16 | 0.0004 | -1.7297  | -1.6651  |
| 119 | 6.5009 | 190.72 | 0.0203 | 5.3578   | 5.4267   |
| 120 | 6.5022 | 190.68 | 0.0412 | 24.5319  | 26.0090  |
| 121 | 6.5162 | 190.27 | 0.0093 | -4.7037  | -4.5560  |
| 122 | 6.5191 | 190.19 | 0.0755 | 1.7892   | 1.8256   |
| 123 | 6.5321 | 189.81 | 0.0000 | 0.2465   | 0.2026   |
| 124 | 6.5461 | 189.40 | 0.0103 | -32.2695 | -33.5374 |
| 125 | 6.5488 | 189.32 | 0.0245 | 51.8677  | 50.4166  |
| 126 | 6.5659 | 188.83 | 0.0099 | -6.2922  | -7.7872  |
| 127 | 6.5661 | 188.83 | 0.0101 | 1.8465   | 1.8964   |
| 128 | 6.5755 | 188.56 | 0.0027 | 4.4534   | 3.2429   |
| 129 | 6.5910 | 188.11 | 0.0093 | 3.6789   | 4.2241   |
| 130 | 6.6008 | 187.83 | 0.0440 | 32.9599  | 32.8860  |
| 131 | 6.6073 | 187.65 | 0.0012 | 1.4905   | 1.4942   |
| 132 | 6.6267 | 187.10 | 0.0100 | -6.0440  | -6.5151  |
| 133 | 6.6370 | 186.81 | 0.0456 | 95.1532  | 95.5948  |
| 134 | 6.6465 | 186.54 | 0.0519 | -23.9829 | -24.5051 |
| 135 | 6.6555 | 186.29 | 0.0093 | -0.9863  | -0.7300  |
| 136 | 6.6609 | 186.14 | 0.0002 | -0.8659  | -0.9187  |
| 137 | 6.6898 | 185.33 | 0.0342 | -19.5344 | -20.5403 |
| 138 | 6.6906 | 185.31 | 0.0080 | -27.6266 | -26.5278 |
| 139 | 6.6978 | 185.11 | 0.0297 | 0.8639   | 1.2405   |
| 140 | 6.7060 | 184.89 | 0.0203 | -44.8926 | -47.2244 |
| 141 | 6.7064 | 184.87 | 0.2907 | -7.8371  | -8.4558  |
| 142 | 6.7174 | 184.57 | 0.0189 | 15.9617  | 16.2264  |
| 143 | 6.7244 | 184.38 | 0.0013 | -12.0082 | -12.3936 |
| 144 | 6.7357 | 184.07 | 0.0019 | 4.4930   | 4.5574   |
| 145 | 6.7433 | 183.86 | 0.0018 | 4.7746   | 4.1061   |
| 146 | 6.7469 | 183.77 | 0.0000 | 0.0347   | 0.0259   |
| 147 | 6.7598 | 183.42 | 0.0001 | 1.6186   | 3.0656   |
| 148 | 6.7626 | 183.34 | 0.0245 | -19.8113 | -19.7327 |
| 149 | 6.7790 | 182.89 | 0.0924 | 6.7272   | 6.3382   |
| 150 | 6.7850 | 182.73 | 0.0344 | 4.3747   | 4.2810   |
| 151 | 6.7887 | 182.63 | 0.0135 | 3.6014   | 3.8811   |
| 152 | 6.7994 | 182.35 | 0.0089 | 1.3041   | 1.3546   |
| 153 | 6.8033 | 182.24 | 0.0006 | -0.6593  | -0.6070  |
| 154 | 6.8209 | 181.77 | 0.1064 | -19.6097 | -20.0434 |
| 155 | 6.8290 | 181.56 | 0.0007 | -3.9212  | -3.9308  |
| 156 | 6.8322 | 181.47 | 0.0362 | -51.5340 | -52.7377 |
| 157 | 6.8366 | 181.35 | 0.0065 | 24.5209  | 25.5917  |
| 158 | 6.8420 | 181.21 | 0.0093 | 1.5914   | 1.2487   |

---

|     |        |        |        |          |          |
|-----|--------|--------|--------|----------|----------|
| 159 | 6.8602 | 180.73 | 0.0030 | 8.1405   | 7.8293   |
| 160 | 6.8626 | 180.67 | 0.0198 | 2.0903   | 3.1269   |
| 161 | 6.8661 | 180.57 | 0.0021 | -3.7896  | -3.3867  |
| 162 | 6.8695 | 180.48 | 0.0078 | -4.4436  | -4.4698  |
| 163 | 6.8840 | 180.10 | 0.0223 | -34.0906 | -35.5441 |
| 164 | 6.8884 | 179.99 | 0.0000 | 0.7914   | 0.4040   |
| 165 | 6.8965 | 179.78 | 0.0068 | -2.8554  | -2.2760  |
| 166 | 6.9203 | 179.16 | 0.0016 | -3.1915  | -2.9811  |
| 167 | 6.9336 | 178.82 | 0.0008 | -2.1207  | -2.5619  |
| 168 | 6.9428 | 178.58 | 0.0083 | 0.1446   | 0.1462   |
| 169 | 6.9436 | 178.56 | 0.0054 | 11.7995  | 14.2441  |
| 170 | 6.9570 | 178.21 | 0.0016 | -8.1981  | -8.2391  |
| 171 | 6.9609 | 178.12 | 0.0091 | -4.7140  | -4.7022  |
| 172 | 6.9750 | 177.76 | 0.0003 | -0.3729  | -0.3593  |
| 173 | 6.9963 | 177.22 | 0.0045 | -0.7897  | -0.8001  |
| 174 | 7.0016 | 177.08 | 0.0132 | 16.1079  | 16.5575  |
| 175 | 7.0041 | 177.02 | 0.0030 | -14.4608 | -14.5767 |
| 176 | 7.0151 | 176.74 | 0.0015 | -0.6850  | -0.8429  |
| 177 | 7.0154 | 176.73 | 0.0186 | 14.3382  | 14.6385  |
| 178 | 7.0258 | 176.47 | 0.0044 | 9.0880   | 10.1530  |
| 179 | 7.0357 | 176.22 | 0.0056 | 20.6252  | 21.6164  |
| 180 | 7.0383 | 176.16 | 0.0059 | 1.1283   | 1.1893   |
| 181 | 7.0391 | 176.14 | 0.0050 | 14.5672  | 14.4888  |
| 182 | 7.0470 | 175.94 | 0.0096 | 1.6824   | 1.8553   |
| 183 | 7.0615 | 175.58 | 0.0168 | -6.1915  | -6.6387  |
| 184 | 7.0649 | 175.49 | 0.0000 | 0.4435   | 1.0901   |
| 185 | 7.0732 | 175.29 | 0.0393 | 70.3196  | 70.6962  |
| 186 | 7.0741 | 175.26 | 0.0140 | -27.2450 | -26.4415 |
| 187 | 7.0950 | 174.75 | 0.0395 | -83.0053 | -85.1133 |
| 188 | 7.1058 | 174.48 | 0.0266 | 11.0036  | 10.1417  |
| 189 | 7.1081 | 174.43 | 0.0053 | -6.4901  | -7.2228  |
| 190 | 7.1177 | 174.19 | 0.0078 | -5.7856  | -6.7660  |
| 191 | 7.1177 | 174.19 | 0.0032 | 16.9962  | 12.8217  |
| 192 | 7.1285 | 173.93 | 0.0093 | 8.3775   | 8.7249   |
| 193 | 7.1337 | 173.80 | 0.0014 | -8.4367  | -7.8456  |
| 194 | 7.1384 | 173.69 | 0.0076 | 3.6018   | 3.6597   |
| 195 | 7.1444 | 173.54 | 0.0023 | 0.2110   | 0.6457   |
| 196 | 7.1459 | 173.50 | 0.0212 | -6.4407  | -6.2953  |
| 197 | 7.1513 | 173.37 | 0.0360 | 21.1653  | 22.5504  |
| 198 | 7.1578 | 173.22 | 0.0197 | -6.4004  | -5.9324  |
| 199 | 7.1658 | 173.02 | 0.0000 | 0.9469   | 1.0455   |
| 200 | 7.1741 | 172.82 | 0.0010 | 1.5413   | 1.7219   |

<sup>a</sup> $\lambda$  in nm. <sup>b</sup> Oscillator Strengths. <sup>c</sup> R values (in  $10^{-40}$  esu<sup>2</sup>cm<sup>2</sup>) using the velocity-gauge representation and length-gauge representation of the electric dipole operator.



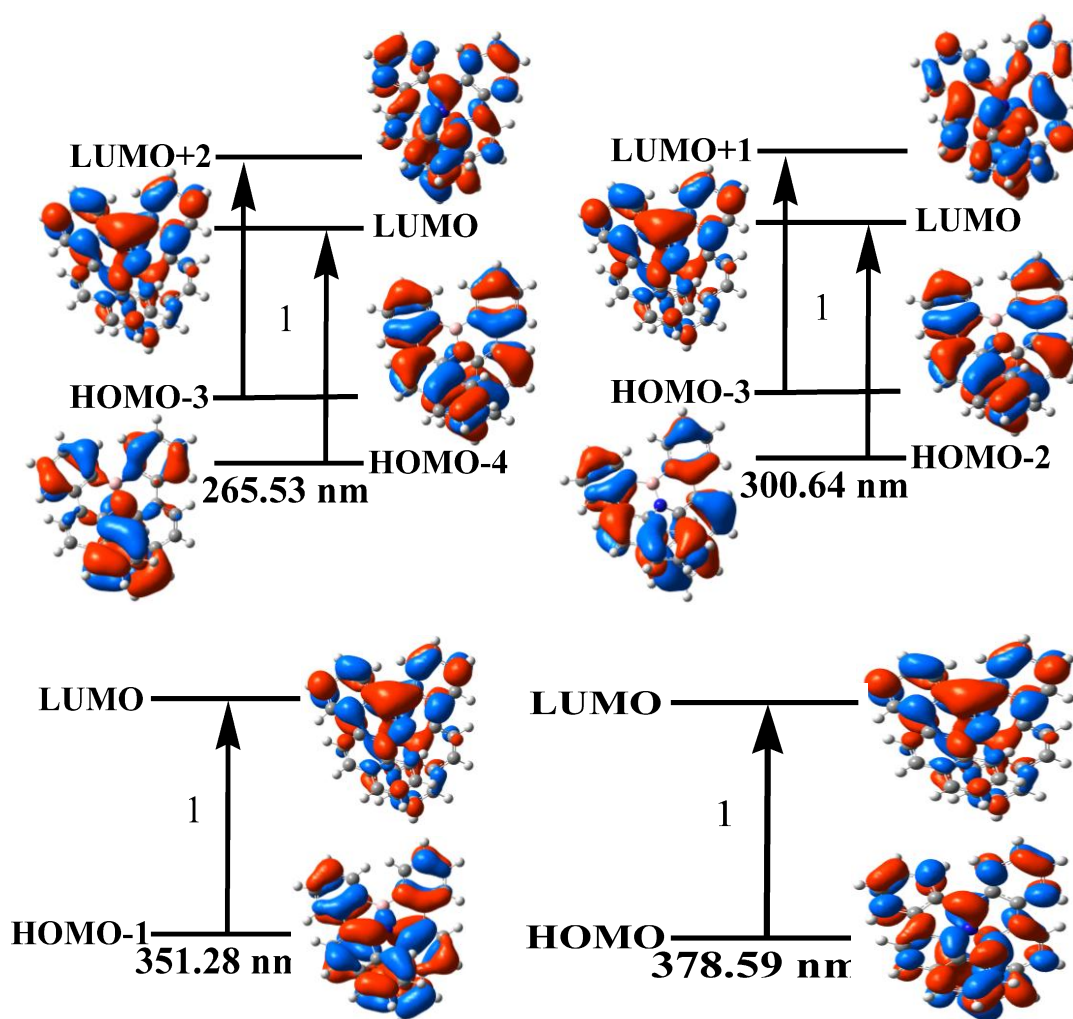

**Figure S2.** Molecular orbitals involved into the main CD transition of compounds **1**

**TABLE S5.** Selected bond lengths (Å) for compound **1**: ground states ( $S_0$ ) and first excited states ( $S_1$ )

| Bond | $S_0$ | $S_1$ | Difference    |
|------|-------|-------|---------------|
| 1    | 1.412 | 1.410 | 0.002         |
| 2    | 1.378 | 1.381 | -0.003        |
| 3    | 1.422 | 1.426 | -0.004        |
| 4    | 1.445 | 1.421 | 0.024         |
| 5    | 1.421 | 1.442 | -0.021        |
| 6    | 1.451 | 1.514 | <b>-0.063</b> |
| 7    | 1.546 | 1.506 | <b>0.040</b>  |
| 8    | 1.409 | 1.421 | -0.012        |
| 9    | 1.390 | 1.381 | 0.009         |

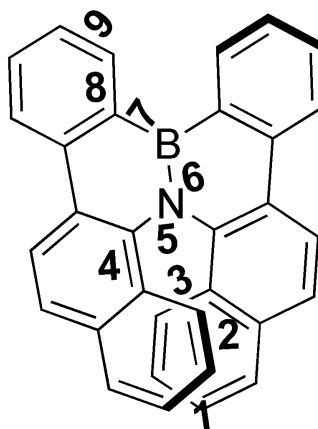

**Table S6.** Calculated bond-length changes (in Å) upon oxidation (CBLA, going from the neutral to the cation state) and reduction (ABLA, going from the neutral to the anion state) of the studied compounds.

| Bonds | ABLA          | CBLA          |
|-------|---------------|---------------|
| 1     | -0.003        | 0.006         |
| 2     | 0.000         | -0.007        |
| 3     | -0.003        | 0.007         |
| 4     | -0.005        | 0.001         |
| 5     | 0.005         | -0.006        |
| 6     | <b>0.011</b>  | <b>0.020</b>  |
| 7     | -0.008        | <b>-0.021</b> |
| 8     | <b>-0.053</b> | <b>-0.034</b> |
| 9     | <b>0.020</b>  | <b>0.010</b>  |
| 10    | <b>-0.012</b> | 0.004         |
| 11    | 0.006         | -0.005        |
| 12    | <b>-0.011</b> | 0.004         |
| 13    | -0.001        | -0.005        |
| 14    | 0.000         | 0.004         |
| 15    | 0.002         | <b>-0.010</b> |
| 16    | 0.000         | 0.010         |
| 17    | 0.000         | -0.001        |
| 18    | -0.005        | -0.008        |
| 19    | 0.003         | 0.001         |
| 20    | 0.001         | 0.003         |
| 21    | -0.002        | -0.005        |

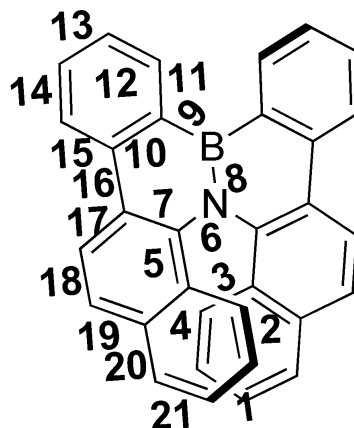

**Table S7.** Computed absorption wavelengths ( $\lambda$  in nm), oscillator strengths ( $f$ ), and major contribution for the studied compounds **2-5**

| Compound | $\lambda$   | $f$    | major contribution                      |
|----------|-------------|--------|-----------------------------------------|
| <b>1</b> | 265.53(252) | 0.487  | HOMO-4→LUMO(57%)<br>HOMO-3→LUMO +2(19%) |
|          | 313.06(313) | 0.114  | HOMO-1→LUMO+2(88%)<br>HOMO-3→LUMO+1(4%) |
|          | 376.85(373) | 0.094  | HOMO→LUMO+1(86%)<br>HOMO-1→LUMO(9%)     |
|          | <b>2</b>    | 272.02 | 0.376                                   |

|          |        |        |                                          |
|----------|--------|--------|------------------------------------------|
|          | 318.82 | 0.153  | HOMO-1→LUMO+2(89%)                       |
|          | 385.05 | 0.153  | HOMO→LUMO(91%)                           |
| <b>3</b> | 269.98 | 0.369  | HOMO→LUMO+9(30%)<br>HOMO-3→LUMO+2(21%)   |
|          | 341.41 | 0.126  | HOMO-1→LUMO+2(93%)                       |
|          | 413.15 | 0.147  | HOMO→LUMO+1(92%)                         |
| <b>4</b> | 298.67 | 0.129  | HOMO-2→LUMO+2(32%)<br>HOMO-1→LUMO+3(41%) |
|          | 352.23 | 0.119  | HOMO→LUMO+2(74%)<br>HOMO-3→LUMO(16%),    |
|          | 446.99 | 0.2476 | HOMO→LUMO(98%)                           |
| <b>5</b> | 302.13 | 0.157  | HOMO-2→LUMO+1(49%)<br>HOMO-1→LUMO+3(27%) |
|          | 402.57 | 0.140  | HOMO-1→LUMO(52%)<br>HOMO→LUMO+1(42%)     |
|          | 511.73 | 0.093  | HOMO→LUMO(98%)                           |

**Table S8.** Computed HOMO and LUMO energy level and corresponding energy gaps ( $E_g$ =LUMO-HOMO) for compounds **2-5**

| Compound | HOMO  | LUMO  | $E_g$ |
|----------|-------|-------|-------|
| <b>1</b> | -5.49 | -1.66 | 3.83  |
| <b>2</b> | -5.74 | -1.99 | 3.76  |
| <b>3</b> | -4.95 | -1.52 | 3.43  |
| <b>4</b> | -6.36 | -3.15 | 3.20  |
| <b>5</b> | -5.50 | -2.65 | 2.85  |

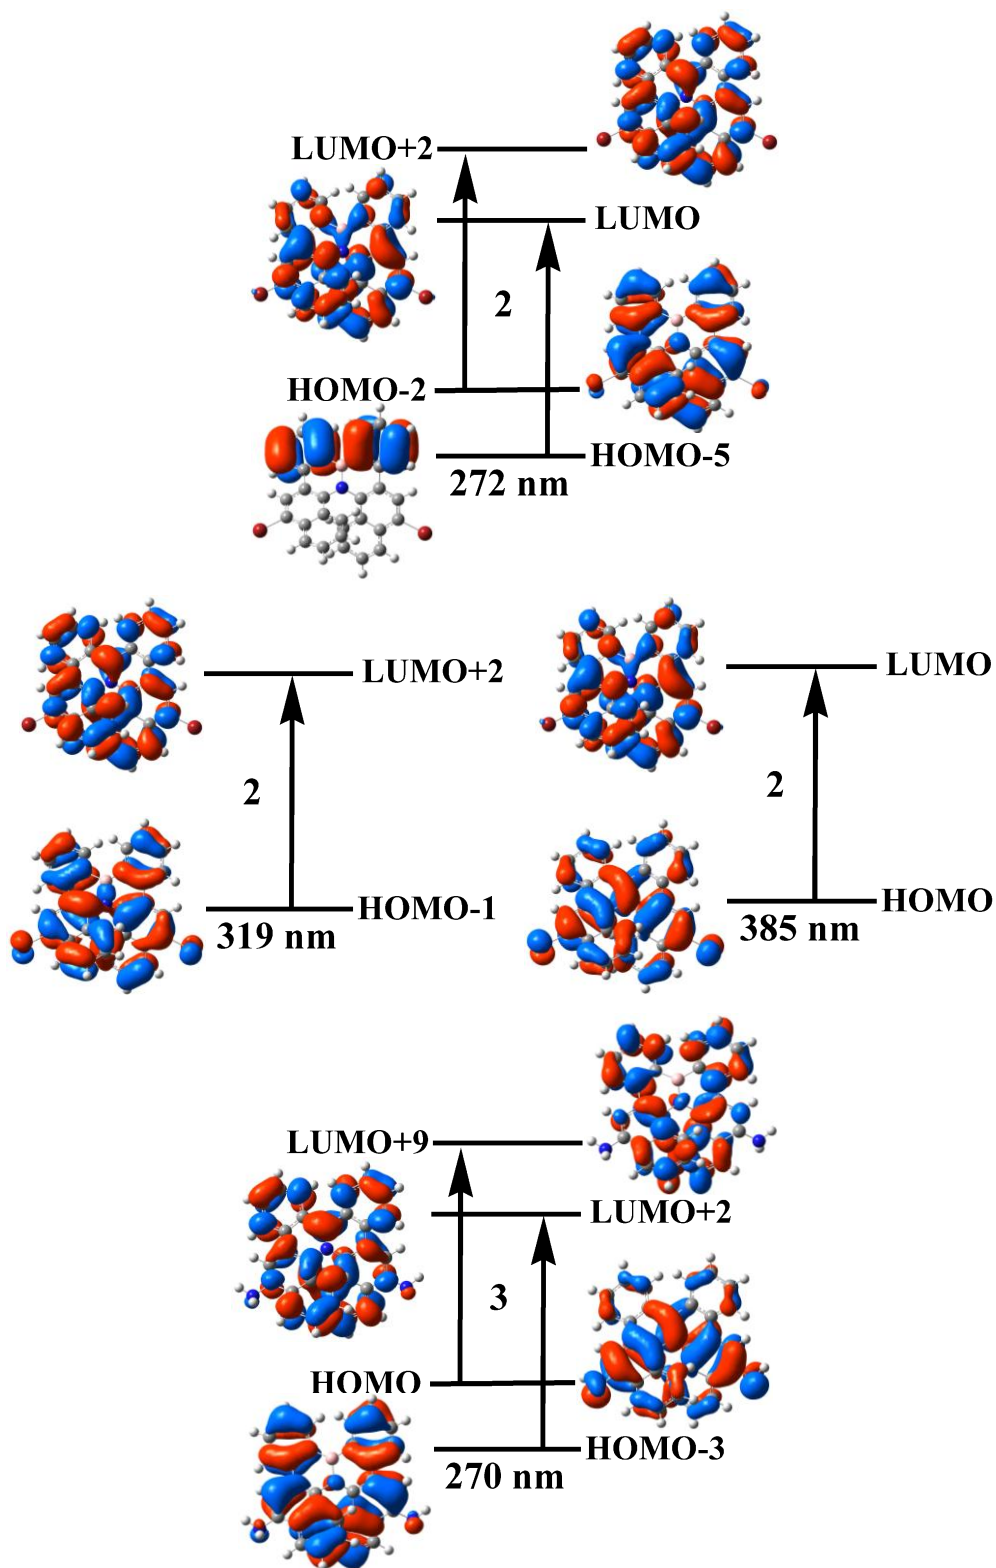

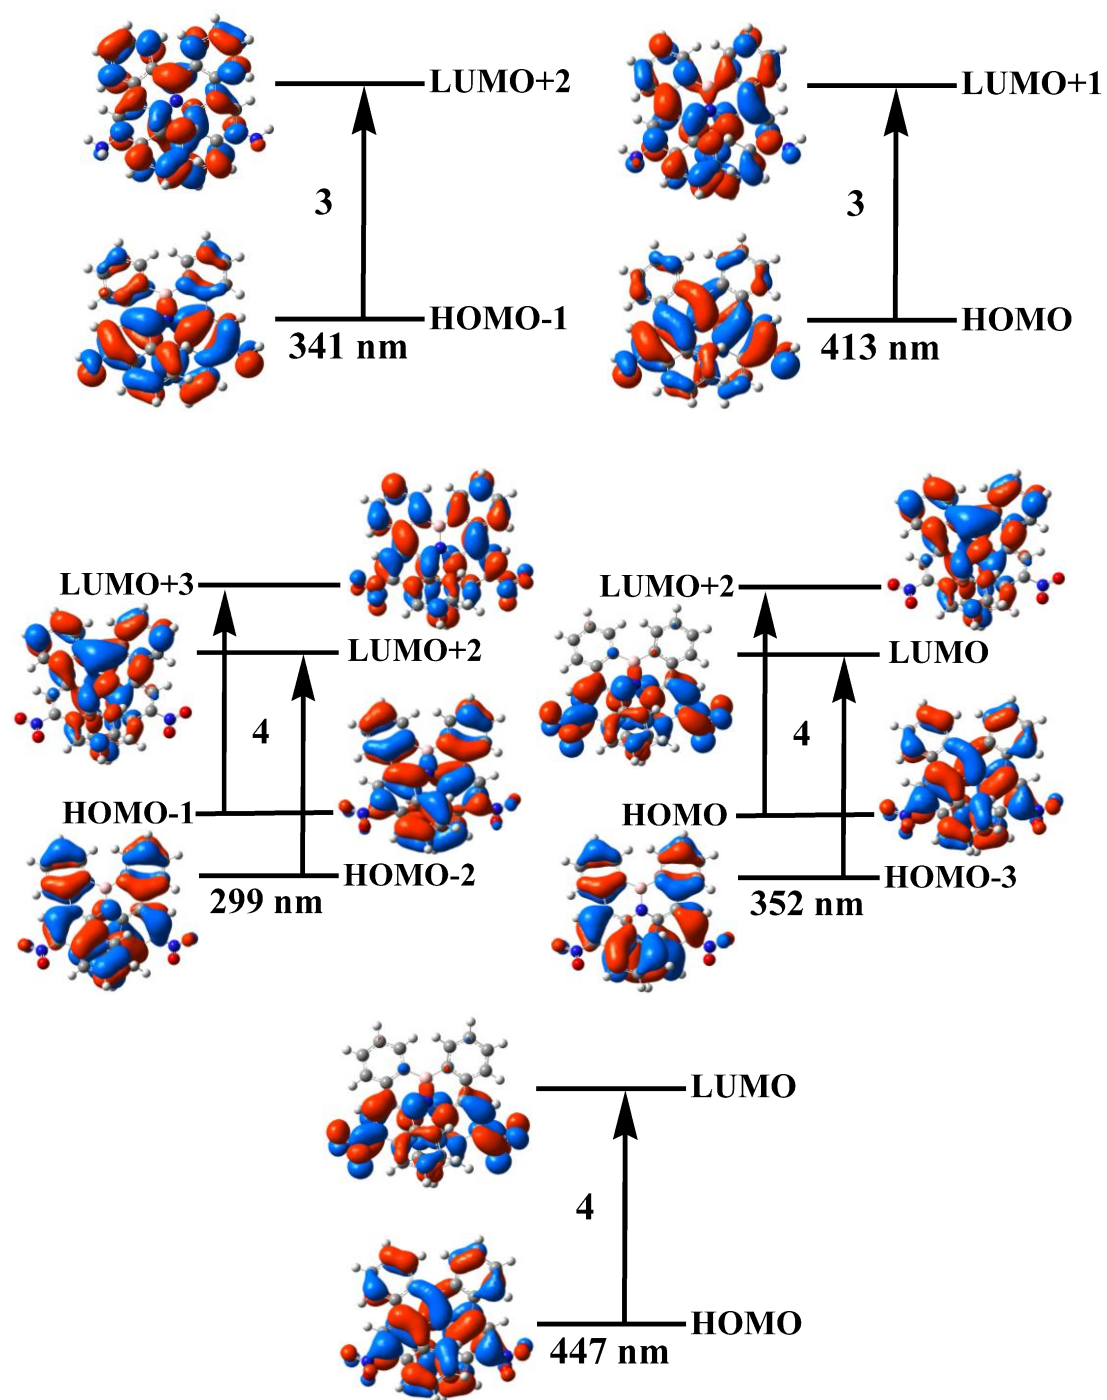

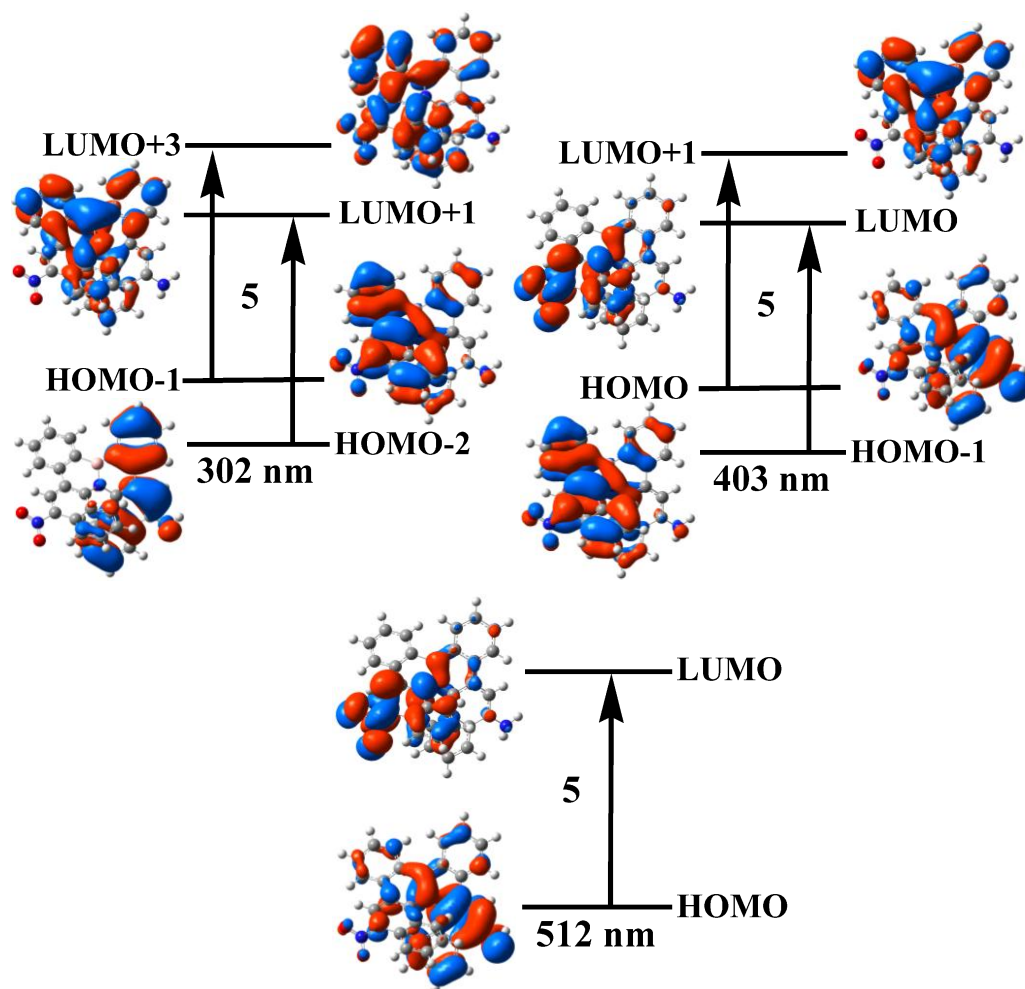

**Figure S3.** Molecular orbital isosurfaces involved in the main electron transitions of compounds 2-5 at the TDB3LYP/6-31+G(d) level of theory.

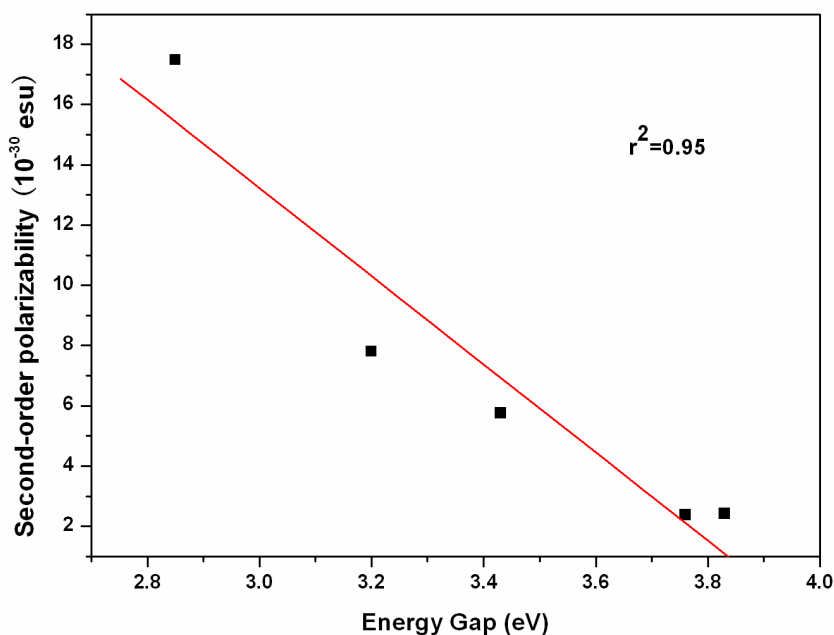

**Figure S4.** Dependence of the second-order NLO value and energy gap

**Table S9.** Cartesian Coordinates of compound **1** at B3LYP/6-31G(d,p) level

| Center Number | Atomic Number | Atomic Type | Coordinates (Angstroms) |           |          |
|---------------|---------------|-------------|-------------------------|-----------|----------|
|               |               |             | x                       | y         | z        |
| 1             | 7             | 0           | 0.799752                | -0.000025 | 5.997001 |
| 2             | 5             | 0           | 2.250676                | -0.000023 | 5.997009 |
| 3             | 6             | 0           | 2.906900                | 1.362282  | 6.320473 |
| 4             | 6             | 0           | 0.131201                | 0.827401  | 6.938962 |
| 5             | 6             | 0           | 2.079867                | 2.392387  | 6.845199 |
| 6             | 6             | 0           | 0.733230                | 2.038473  | 7.318554 |
| 7             | 6             | 0           | 4.218124                | 1.690456  | 5.921452 |
| 8             | 1             | 0           | 4.843976                | 0.925293  | 5.474240 |
| 9             | 6             | 0           | -1.074864               | 0.382081  | 7.599522 |
| 10            | 6             | 0           | -1.594224               | -0.937806 | 7.492955 |
| 11            | 1             | 0           | -1.070516               | -1.675489 | 6.900737 |
| 12            | 6             | 0           | -2.744726               | -1.312586 | 8.152426 |
| 13            | 1             | 0           | -3.106375               | -2.332063 | 8.057516 |
| 14            | 6             | 0           | -3.450536               | -0.388956 | 8.953416 |
| 15            | 1             | 0           | -4.364566               | -0.690800 | 9.456085 |
| 16            | 6             | 0           | -2.955218               | 0.884439  | 9.113166 |
| 17            | 1             | 0           | -3.463402               | 1.598855  | 9.755468 |
| 18            | 6             | 0           | -1.756846               | 1.291300  | 8.471873 |

---

|    |   |   |           |           |          |
|----|---|---|-----------|-----------|----------|
| 19 | 6 | 0 | -1.186300 | 2.564851  | 8.736269 |
| 20 | 1 | 0 | -1.703022 | 3.244423  | 9.407966 |
| 21 | 6 | 0 | 0.031943  | 2.897453  | 8.214494 |
| 22 | 1 | 0 | 0.492173  | 3.833690  | 8.507300 |
| 23 | 6 | 0 | 2.588256  | 3.702221  | 6.939568 |
| 24 | 1 | 0 | 1.959794  | 4.509941  | 7.298328 |
| 25 | 6 | 0 | 3.889536  | 3.991579  | 6.548578 |
| 26 | 1 | 0 | 4.259161  | 5.010232  | 6.626214 |
| 27 | 6 | 0 | 4.714510  | 2.983101  | 6.039094 |
| 28 | 1 | 0 | 5.726808  | 3.213069  | 5.720085 |
| 29 | 6 | 0 | 2.906911  | -1.362313 | 5.673501 |
| 30 | 6 | 0 | 0.131216  | -0.827433 | 5.055017 |
| 31 | 6 | 0 | 2.079890  | -2.392408 | 5.148738 |
| 32 | 6 | 0 | 0.733253  | -2.038488 | 4.675387 |
| 33 | 6 | 0 | 4.218141  | -1.690486 | 6.072504 |
| 34 | 1 | 0 | 4.843985  | -0.925331 | 6.519741 |
| 35 | 6 | 0 | -1.074844 | -0.382094 | 4.394467 |
| 36 | 6 | 0 | -1.594217 | 0.937781  | 4.501108 |
| 37 | 1 | 0 | -1.070521 | 1.675431  | 5.093379 |
| 38 | 6 | 0 | -2.744716 | 1.312586  | 3.841647 |
| 39 | 1 | 0 | -3.106376 | 2.332054  | 3.936612 |
| 40 | 6 | 0 | -3.450509 | 0.388993  | 3.040599 |
| 41 | 1 | 0 | -4.364538 | 0.690857  | 2.537939 |
| 42 | 6 | 0 | -2.955181 | -0.884390 | 2.880786 |
| 43 | 1 | 0 | -3.463355 | -1.598777 | 2.238445 |
| 44 | 6 | 0 | -1.756812 | -1.291276 | 3.522069 |
| 45 | 6 | 0 | -1.186258 | -2.564814 | 3.257626 |
| 46 | 1 | 0 | -1.702970 | -3.244361 | 2.585895 |
| 47 | 6 | 0 | 0.031980  | -2.897435 | 3.779403 |
| 48 | 1 | 0 | 0.492217  | -3.833656 | 3.486562 |
| 49 | 6 | 0 | 2.588292  | -3.702233 | 5.054322 |
| 50 | 1 | 0 | 1.959840  | -4.509947 | 4.695531 |
| 51 | 6 | 0 | 3.889575  | -3.991591 | 5.445302 |
| 52 | 1 | 0 | 4.259211  | -5.010237 | 5.367629 |
| 53 | 6 | 0 | 4.714539  | -2.983122 | 5.954821 |
| 54 | 1 | 0 | 5.726839  | -3.213091 | 6.273821 |

---
